# Supplementary material for: Eumelanin Detection in Melanized Focal Changes but Not in Red Focal Changes on Atlantic Salmon (Salmo salar) Fillets
Source: MDPI journal article supplement (doi:10.3390/ijms242316797), 2023-11-27
Supplement: s1 [file s1]

## Supplementary Tables

### Supplemental Table S1

Average values of spectrophotometric and chemical degradation analyses of control, MFC (BS-small, BS-medium, BS-large) and RFC (RS-small, RS-medium, RS-large) in Materials #1. The number of samples in each group = 3.

|             | A500 x 1000<br>(1/mg) | A650/A500 x 100 | PTCA<br>(ng/mg) | PDCA<br>(ng/mg) | 4-AHP<br>(ng/mg) | 3-AHP<br>(ng/mg) | HI-DOPA<br>(ng/mg) | PB-5SCD<br>(ng/mg) | 4-AHP/3-AHP |
|-------------|-----------------------|-----------------|-----------------|-----------------|------------------|------------------|--------------------|--------------------|-------------|
| Control     | 6.5                   | 2.6             | 0.72            | 0.23            | 0.26             | 0.13             | 4.7                | 2.3                | 2.0         |
| BS-small    | 7.3                   | 6.8             | 3.4             | 0.32            | 0.15             | 0.28             | 2.4                | 2.6                | 0.54        |
| BS-medium   | 9.7                   | 18.2            | 7.0             | 0.42            | 0.12             | 0.30             | 4.5                | 2.1                | 0.40        |
| BS-large    | 14.7                  | 22.0            | 19.4            | 0.95            | 0.13             | 0.53             | 4.9                | 2.2                | 0.25        |
| RS-small    | 14.8                  | 6.8             | 2.1             | 0.24            | 0.47             | 0.57             | 10.3               | 4.3                | 0.83        |
| RS - medium | 19.6                  | 5.3             | 1.6             | 0.27            | 0.66             | 1.0              | 15.3               | 5.2                | 0.66        |
| RS - Large  | 20.8                  | 5.0             | 0.7             | 0.23            | 0.71             | 0.85             | 17.0               | 5.1                | 0.83        |

### Supplemental Table S2

Average values of spectrophotometric and chemical degradation analyses of control (n = 2), MFC (BS-small, n = 3; BS-medium, n = 17; BS-large, n = 7) and RFC (n = 3) in Materials #2.

|                      | A500 x 1000<br>(1/mg) | A650/A500 x 100 | PTCA<br>(ng/mg) | PDCA<br>(ng/mg) | 4-AHP<br>(ng/mg) | 3-AHP<br>(ng/mg) | HI-DOPA<br>(ng/mg) | 4-AHP/3-AHP |
|----------------------|-----------------------|-----------------|-----------------|-----------------|------------------|------------------|--------------------|-------------|
| Control (n = 2)      | 7.5                   | 6.7             | 0.33            | 0.30            | 0.13             | 0.74             | 15.3               | 0.18        |
| BS - small (n = 3)   | 8.3                   | 9.0             | 2.5             | 0.45            | 0.11             | 0.68             | 10.1               | 0.16        |
| BS - medium (n = 17) | 9.2                   | 15.8            | 7.8             | 0.60            | 0.19             | 0.90             | 11.0               | 0.21        |
| BS - Large (n = 7)   | 11.6                  | 18.6            | 13.7            | 0.70            | 0.14             | 0.47             | 12.5               | 0.30        |
| RFC (n = 3)          | 24.6                  | 9.9             | 0.35            | 0.55            | 0.61             | 1.2              | 18.8               | 0.51        |

## Supplementary figures

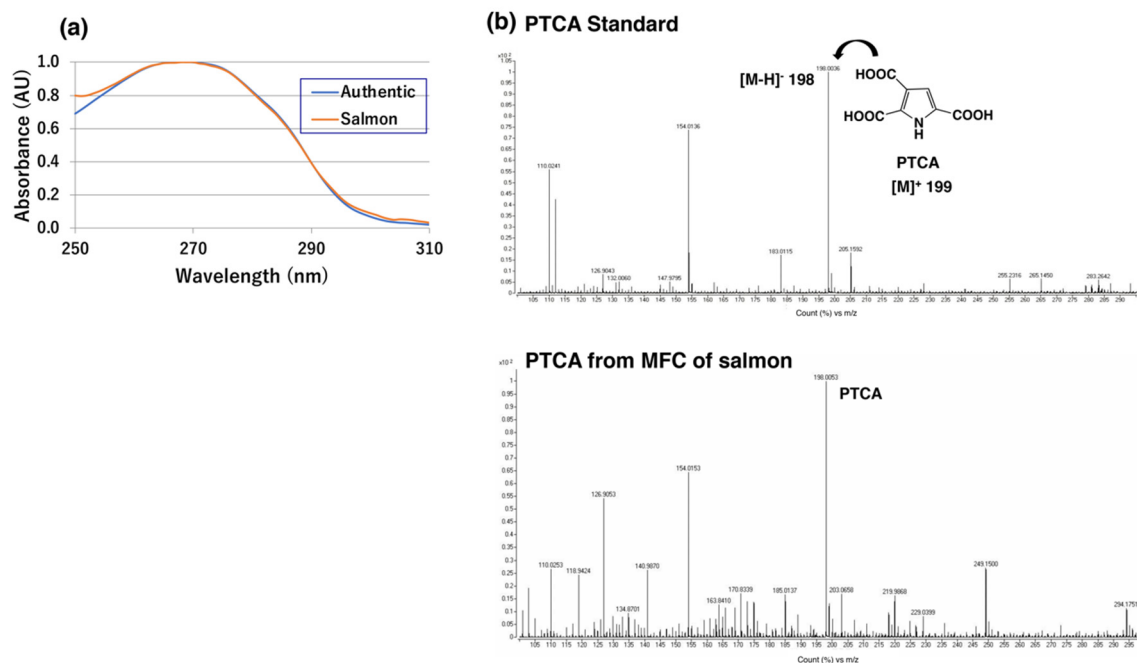

**Supplemental Figure S1.** The identification of PTCA was obtained by isolating PTCA in a preparative scale AHPO in MFC. The UV-VIS (Suppl. Fig. S1a) and Mass spectra (Suppl. Fig. S1b) were confirmed by the comparison of authentic PTCA samples and PTCA isolated from MFC of salmon.

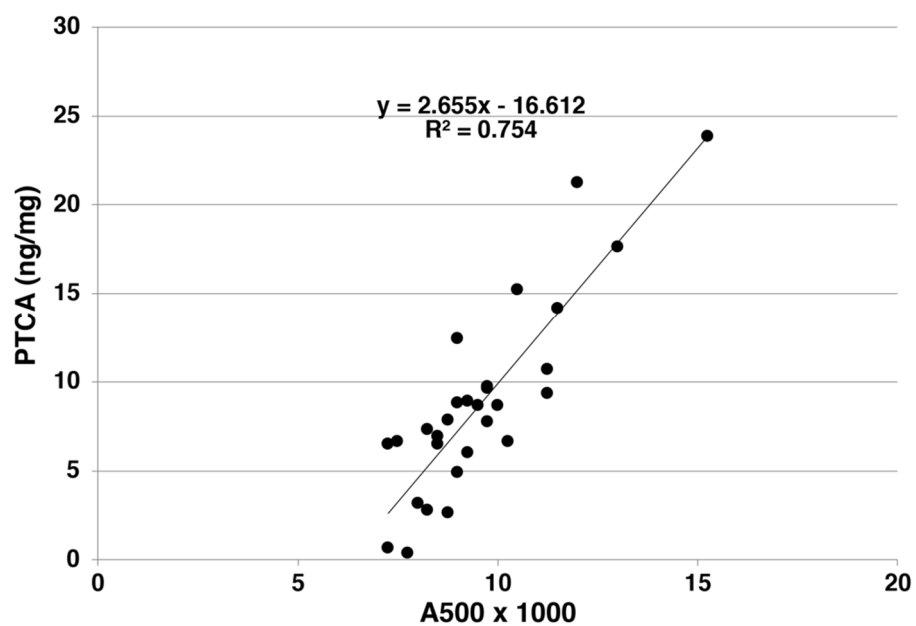

**Supplemental Figure S2.** The correlation of PTCA with A500 values. The PTCA values correlated well ( $R^2 = 0.754$ ) with the A500 values with a background value of 0.006/mg. This shows that MFC is mostly due to EM.
